# Supplementary material for: Clinical implications of loss of bone marrow minimal residual disease negativity in multiple myeloma
Source: PubMed Central journal article supplement — Blood Adv. 2022 Jan 31;6(3):808–17. doi: 10.1182/bloodadvances.2021005822 (PMC8945288; doi:10.1182/bloodadvances.2021005822), 2022-01-31
Supplement: advancesADV2021005822-suppl1.pdf [file advancesADV2021005822-suppl1.pdf]

| Total Therapy 1<br>(August 1990 – June 1995) | Total Therapy 2<br>(October 1998 – February 2004) | Total Therapy 3<br>(February 2004 - August 2009)                                   | Total Therapy 4<br>(June 2008 – January 2019)                                                          |                                                                        |
|----------------------------------------------|---------------------------------------------------|------------------------------------------------------------------------------------|--------------------------------------------------------------------------------------------------------|------------------------------------------------------------------------|
|                                              | Randomization ± Thal                              |                                                                                    | Light                                                                                                  | Standard                                                               |
| <b>Induction</b>                             | <b>Induction</b>                                  | <b>Induction</b>                                                                   | <b>Induction</b>                                                                                       | <b>Induction</b>                                                       |
| VAD x 3<br>HD CTX + HPC Collection<br>EDAP   | VAD ± Thal<br>DCEP 1 & 2<br>CAD + HPC Collection  | VDT-PACE<br>+ collection of CD34+ cells<br>VDT-PACE                                | MEL-VDT-PACE<br>+ collection of CD34+ cells                                                            | MEL-VDT-PACE<br>+ collection of CD34+ cells<br>MEL-VDT PACE            |
| <b>Transplant</b>                            | <b>Transplant</b>                                 | <b>Transplant</b>                                                                  | <b>Transplant</b>                                                                                      | <b>Transplant</b>                                                      |
| MEL 200 mg/m2<br>MEL 200 mg/m2               | MEL 200 mg/m2<br>MEL 200 mg/m2                    | MEL 200 mg/m2<br>MEL 200 mg/m2                                                     | VDT-MEL 200 mg/m2<br>(fractionated: 50mg/m2 d1-4)<br>VDT-MEL 200 mg/m2<br>(fractionated: 50mg/m2 d1-4) | MEL 200 mg/m2<br>(unfractionated)<br>MEL 200 mg/m2<br>(unfractionated) |
| <b>Consolidation</b>                         | <b>Consolidation</b>                              | <b>Consolidation</b>                                                               | <b>Consolidation</b>                                                                                   | <b>Consolidation</b>                                                   |
| Not Applicable                               | DPACE x 4 cycles ± Thal                           | VDT-PACE (dose reduced)<br>VDT-PACE (dose reduced)                                 | VDT-PACE (dose reduced)                                                                                | VDT-PACE (dose reduced)<br>VDT-PACE (dose reduced)                     |
| <b>Maintenance</b>                           | <b>Maintenance</b>                                | <b>Maintenance</b>                                                                 | <b>Maintenance</b>                                                                                     | <b>Maintenance</b>                                                     |
| IFN TIW                                      | Year 1: Dex + IFN ± Thal<br>Year 2-3: IFN ± Thal  | TT3A<br>Year 1: VTD weekly<br>Year 2-3: TD weekly<br>TT3B<br>Years 1-3: VRD weekly | Years 1-3: VRD weekly                                                                                  | Years 1-3: VRD                                                         |

| Total Therapy 5<br>(November 2008 - January 2019)                                      | Total Therapy 5b<br>(November 2008 - January 2019) | Total Therapy 6<br>(April 2009 - January 2019)                                 | Total Therapy 7<br>(August 2017 - )                                                       |
|----------------------------------------------------------------------------------------|----------------------------------------------------|--------------------------------------------------------------------------------|-------------------------------------------------------------------------------------------|
| <b>Induction</b>                                                                       | <b>Induction</b>                                   | <b>Induction</b>                                                               | <b>Induction</b>                                                                          |
| MEL10-VDT-PACE<br>+ collection of CD34+ cells                                          | MEL 10-CFZ-TD-PACE<br>+ PBSC collection            | MEL-10-VTD-PACE<br>+ PBSC collections                                          | KTD-Dara-PACE<br>+ PBSC Harvest                                                           |
| <b>Transplant 1</b>                                                                    | <b>Transplant 1</b>                                | <b>Transplant 1</b>                                                            | <b>Transplant 1</b>                                                                       |
| MEL-80 + VRD-PACE                                                                      | MEL-80 + CFZ-TD-PACE                               | MEL-80 - VRD-PACE                                                              | fMEL 200                                                                                  |
| <b>Intertherapy</b>                                                                    | <b>Intertherapy</b>                                | <b>Intertherapy</b>                                                            | <b>Intertherapy</b>                                                                       |
| MEL-20 (5mg/m2/d x 4d) + VTD-PACE<br>(75%) 2 cycles                                    | MEL-20 (5mg/m2/d x 4d) + CFZ-<br>TD-PACE (75%)     | MEL 5mg/m2-VDT-PACE 75%<br>MEL 5mg/m2-VDT-PACE 75%                             | Immunological-Consolidation 1<br>Daratumumab                                              |
| <b>Transplant 2</b>                                                                    | <b>Transplant 2</b>                                | <b>Transplant 2</b>                                                            | <b>Consolidation 1</b>                                                                    |
| MEL-80 + VRD-PACE                                                                      | MEL-80 + CFZ-TD-PACE                               | MEL-80 - VRD-PACE                                                              | Daratumumab + KD                                                                          |
|                                                                                        | <b>Consolidation</b>                               |                                                                                | <b>Transplant 2</b>                                                                       |
|                                                                                        | CFZ-TD-PACE                                        |                                                                                | fMEL 200                                                                                  |
| <b>Maintenance</b>                                                                     | <b>Maintenance</b>                                 | <b>Maintenance</b>                                                             | <b>Maintenance</b>                                                                        |
| Year 1:<br>VRD/VMD alternating q month<br>Years 2-3:<br>VRD/VMD alternating q 2 months | Year 1:<br>CRD monthly<br>Years 2-3:<br>CD monthly | Year 1:<br>VRD alternating q month<br>Years 2-3:<br>VRD alternating q 2 months | Daratumumab (monthly) + KD*<br>Daratumumab (monthly) + RD<br>(alternating 3-month blocks) |

## Appendix Figure 1: Total Therapy Schemas

VDT-PACE: bortezomib (Velcade), dexamethasone, thalidomide, cisplatin (Platinum), doxorubicin (Adriamycin), cyclophosphamide, etoposide; MEL: melphalan; VTD: bortezomib (Velcade), thalidomide, dexamethasone; TD: thalidomide, dexamethasone; MEL-VDT-PACE: melphalan, bortezomib (Velcade), dexamethasone, thalidomide, cisplatin (Platinum), doxorubicin (Adriamycin), cyclophosphamide, etoposide; VDT-MEL: bortezomib (Velcade), dexamethasone, thalidomide, melphalan; VRD: bortezomib (Velcade), lenalidomide (Revlimid), dexamethasone; VMD: bortezomib (Velcade), melphalan, dexamethasone; CRD: carfilzomib, Revlimid®, dexamethasone; CD: carfilzomib + dexamethasone; fMEL: fractionated melphalan; KD: carfilzomib and dexamethasone; RD: lenalidomide and dexamethasone.

**Supplemental Table 1. Minimal Residual Disease (MRD) Patterns According to Treatment**

| Treatment Protocol | MRD Status   |                | Median Time to MRD Conversion (range) |                    |
|--------------------|--------------|----------------|---------------------------------------|--------------------|
|                    | MRD Negative | MRD conversion | From Dx                               | From ASCT          |
| Off-TTP (n = 223)  | 133 (59.6)   | 90 (40.4)      | 7.9 (1.4 – 27.1)                      | 7.6 (1.0 – 24.5)   |
| TTP1 (n = 4)       | 3 (75.0)     | 1 (25.0)       | 24.1 (21.8 – 30.9)                    | 23.3 (21.0 – 27.8) |
| TTP2 (n = 64)      | 38 (59.4)    | 26 (40.6)      | 16.1 (9.5 – 21.0)                     | 15.6 (8.8 – 21.0)  |
| TTP3a (n = 46)     | 28 (60.9)    | 18 (39.1)      | 13.4 (7.1 – 15.5)                     | 13.0 (6.9 – 15.1)  |
| TTP3b (n = 36)     | 27 (75.0)    | 9 (25.0)       | 11.2 (4.8 – 12.9)                     | 11.0 (4.5 – 12.6)  |
| TTP4 (n = 135)     | 86 (63.7)    | 49 (36.3)      | 7.2 (1.8 – 17.5)                      | 6.5 (1.4 – 10.7)   |
| TTP5 (n = 20)      | 13 (65.0)    | 7 (35.0)       | 6.1 (1.2 – 10.2)                      | 5.9 (0.9 – 9.9)    |
| TTP5b (n = 1)      | 1 (100.0)    | 0 (0.0)        | 5.4 (N/A)                             | 5.1 (N/A)          |
| TTP6 (n = 39)      | 15 (38.5)    | 24 (61.5)      | 5.4 (1.5 – 10.5)                      | 5.1 (1.1 – 10.2)   |

NOTE. Data are no. (%) unless otherwise noted. Median time to MRD conversion is provided in years. Abbreviations: TTP, Total Therapy Protocol; Dx, diagnosis; ASCT, autologous stem cell transplant; N/A, non-applicable
